# Supplementary material
Source: MDPI journal article supplement (https://www.mdpi.com/2073-4433/14/1/177)
Supplement: s1 [file s1]

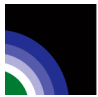

# Supplementary Materials: Experimental Verification of Mist Cooling Effect in Front of Air-Conditioning Condenser Unit, Open Space, and Bus Stop

Sae Kyogoku and Hideki Takebayashi

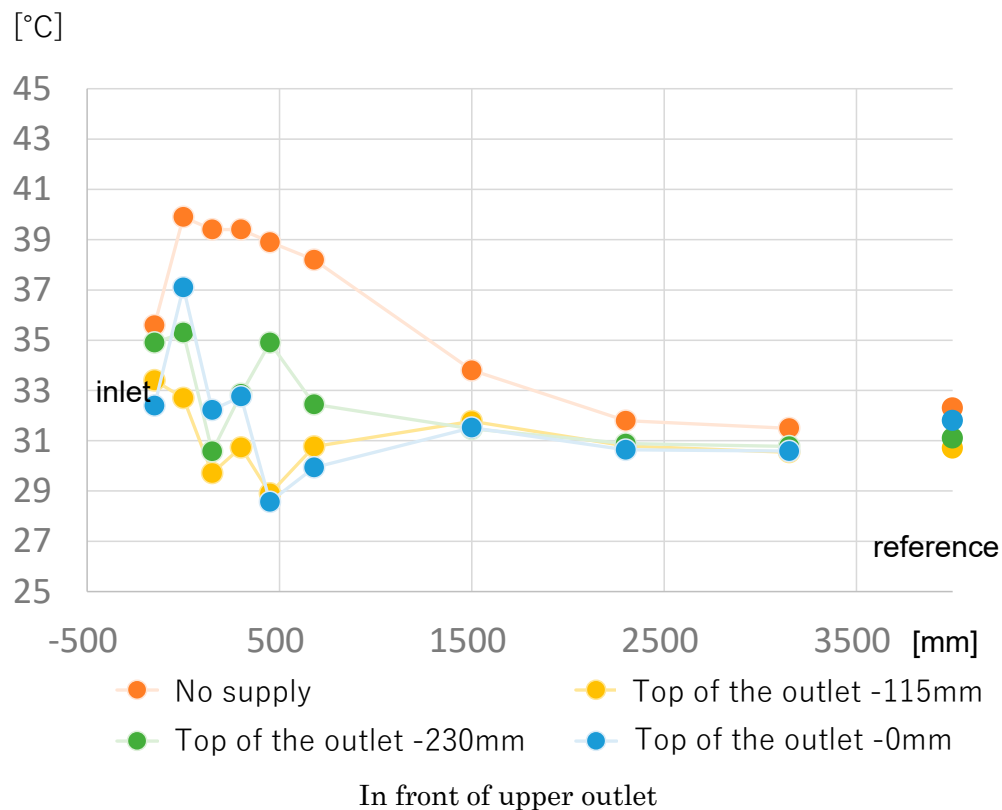

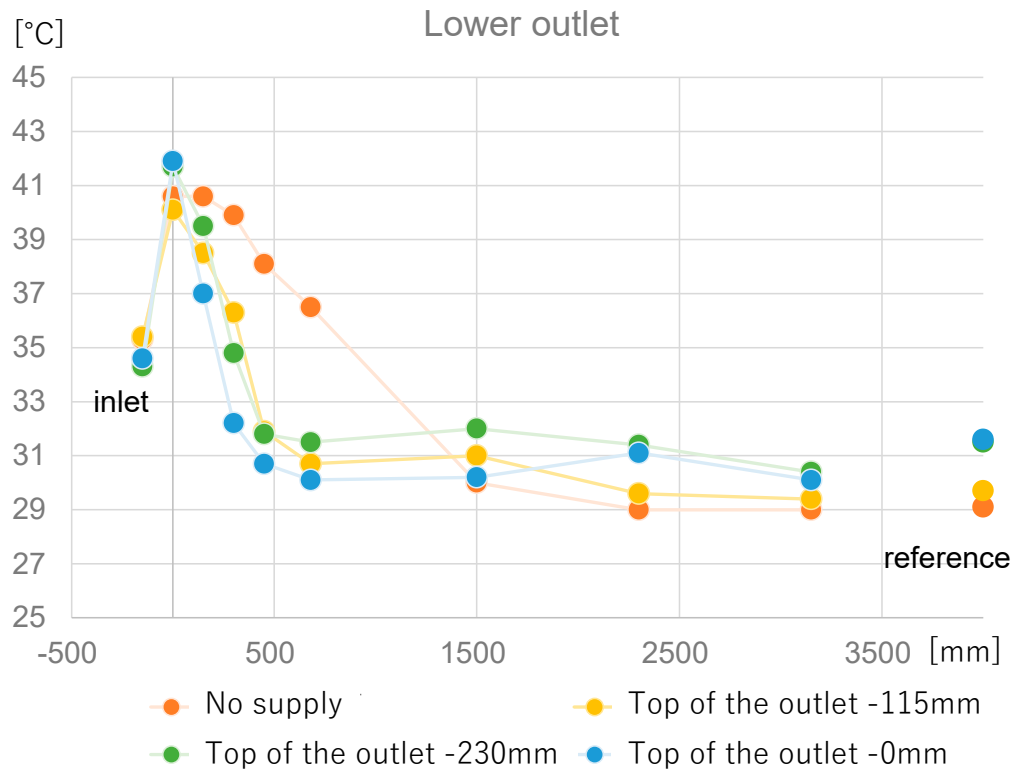

**Figure S1.** Measurement results of air temperature in front of air-conditioning condenser units at from 14:27 to 15:22 on August 25, 2021.

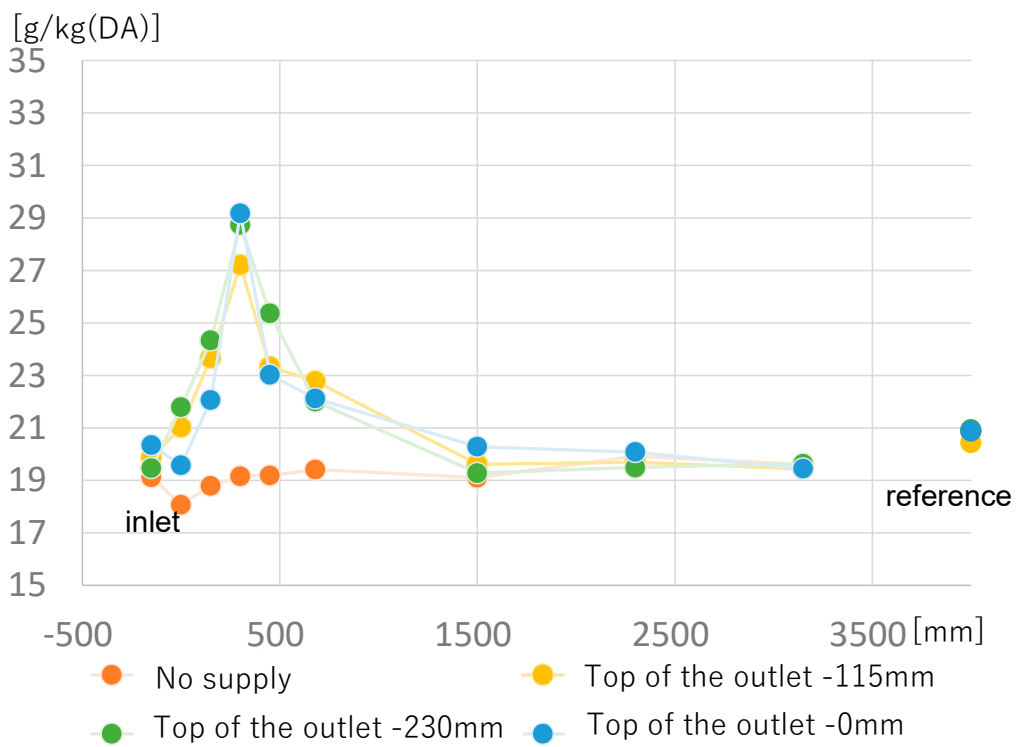

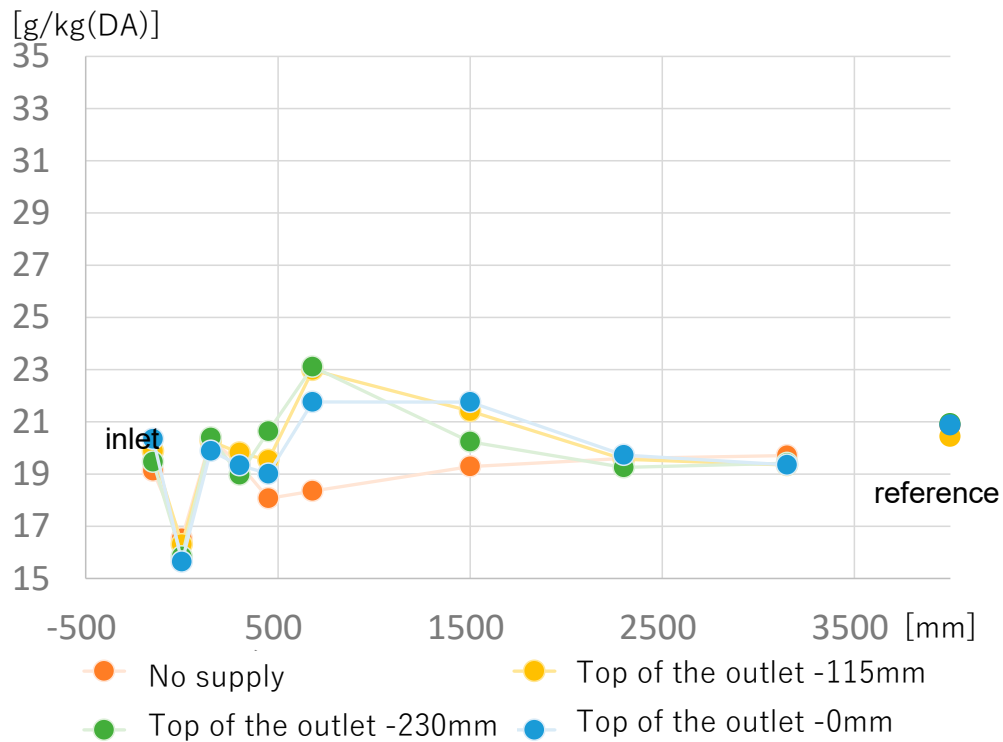

In front of lower outlet

**Figure S2.** Measurement results of humidity in front of air-conditioning condenser units at from 14:27 to 15:22 on August 25, 2021.

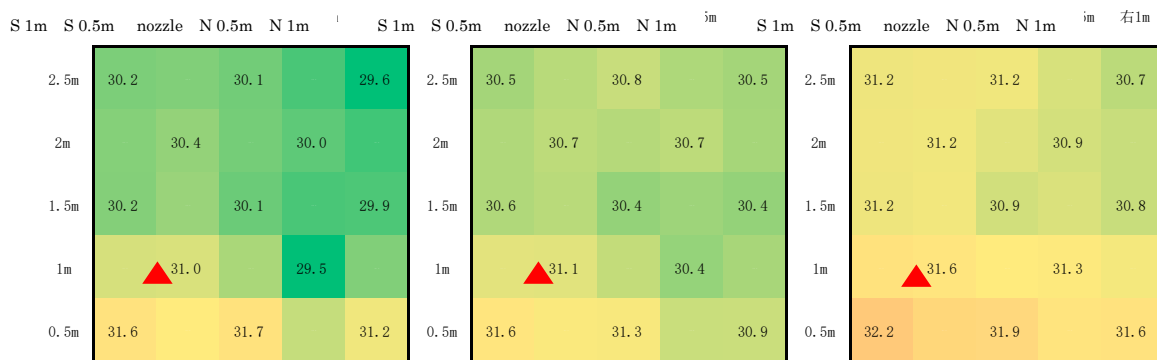

Left panel: 0.9m, center panel: 1.4m, right panel: 1.9m from nozzle

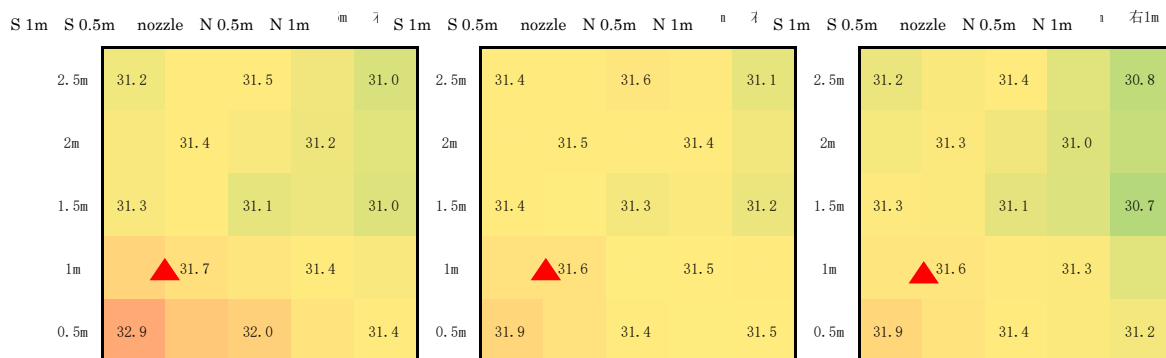

Left panel: 2.4m, center panel: 2.9m, right panel: 3.4m from nozzle

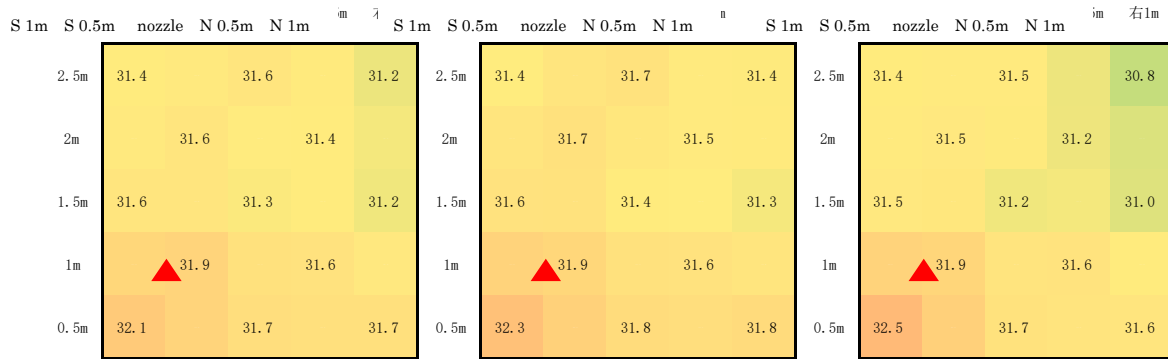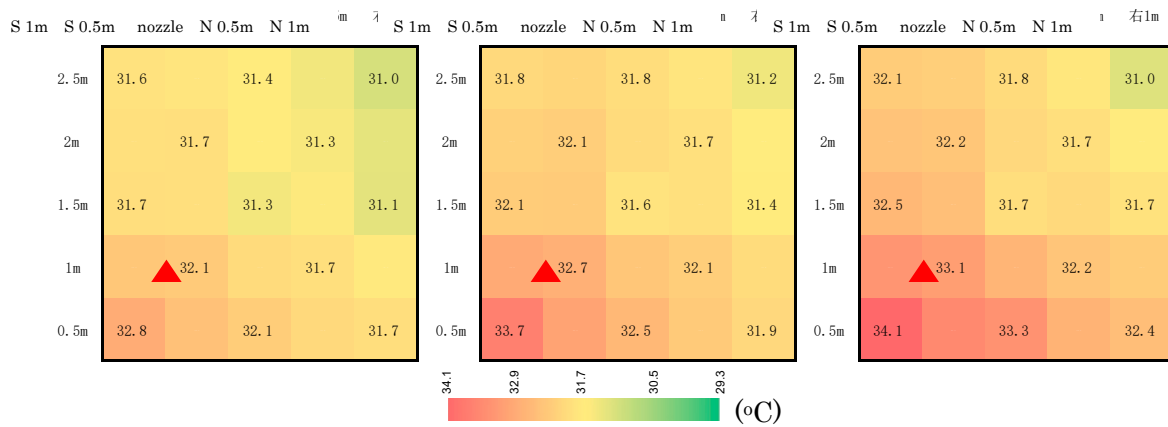

**Figure S3.** Vertical section of measured air temperature in a park at 10:30 (▲: nozzle position).

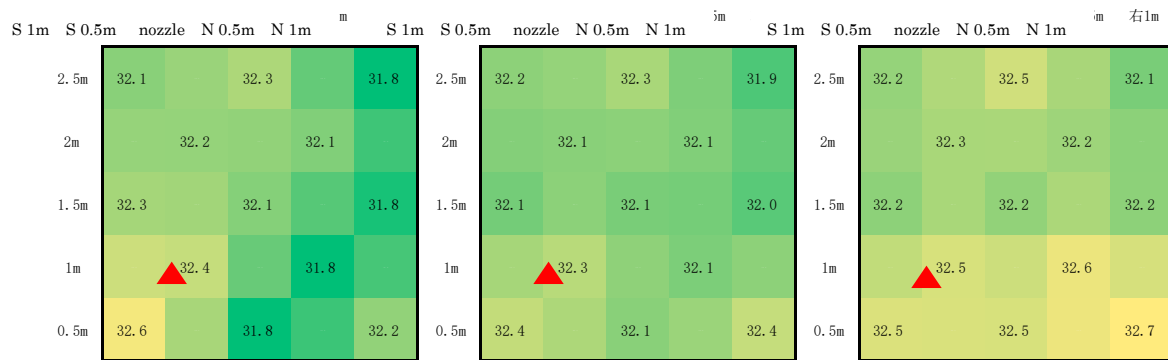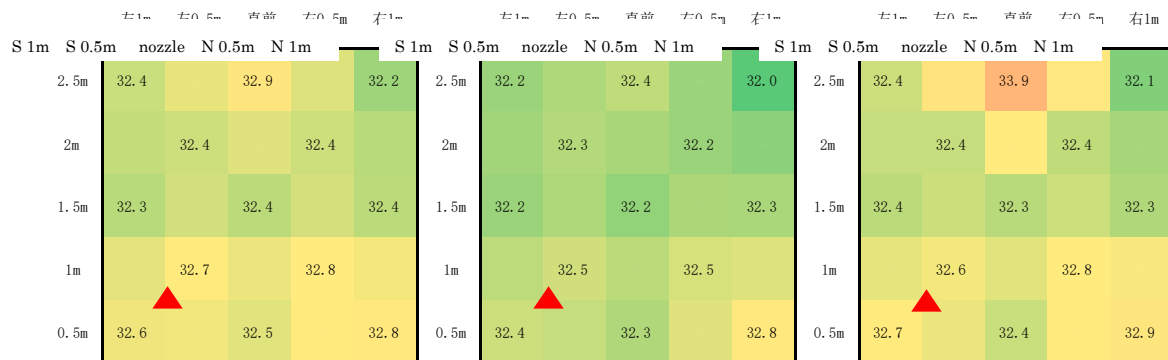

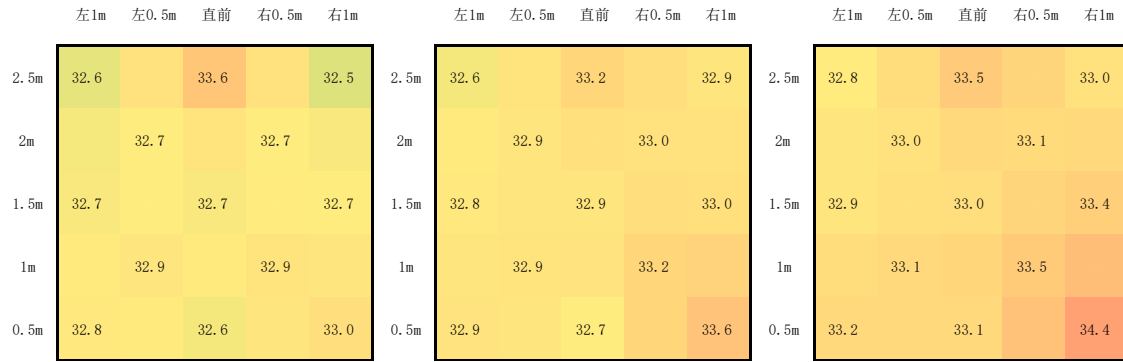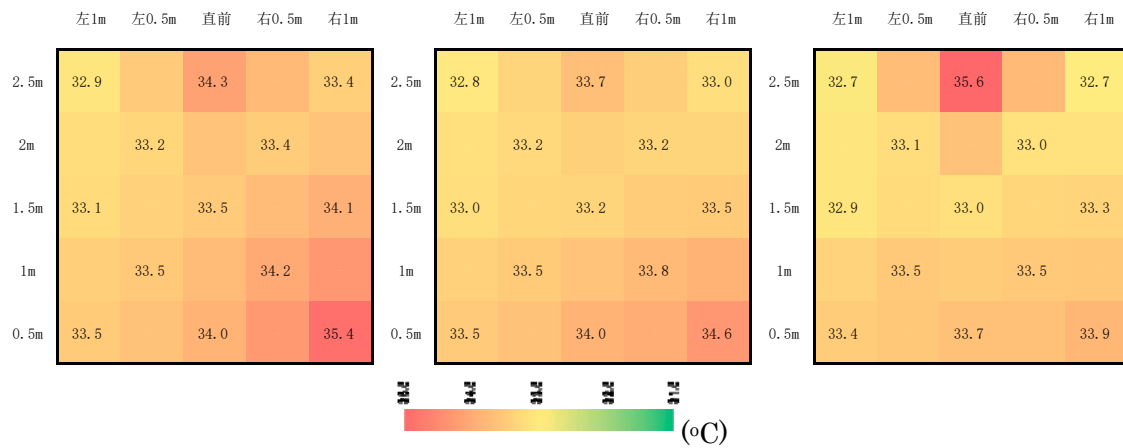

**Figure S4.** Vertical section of measured air temperature in a park at 13:00 (▲: nozzle position).

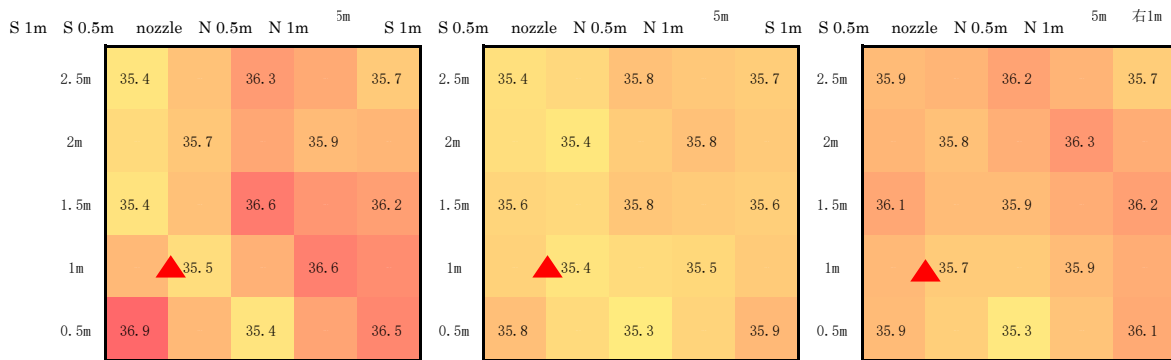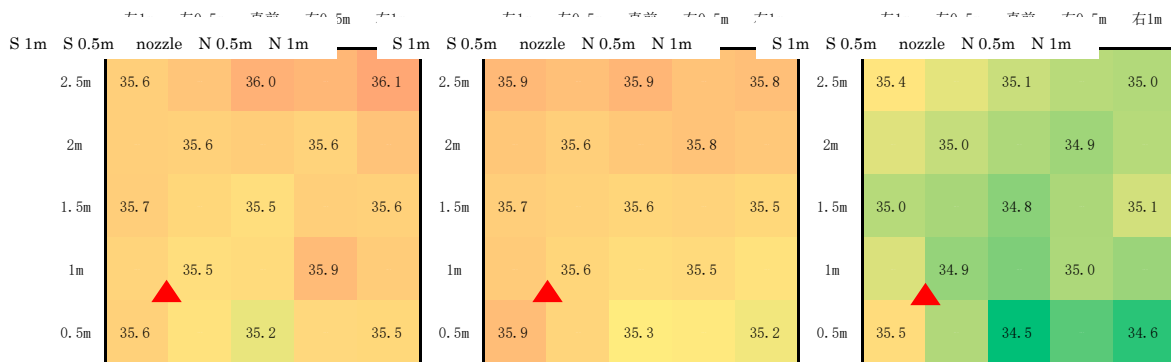

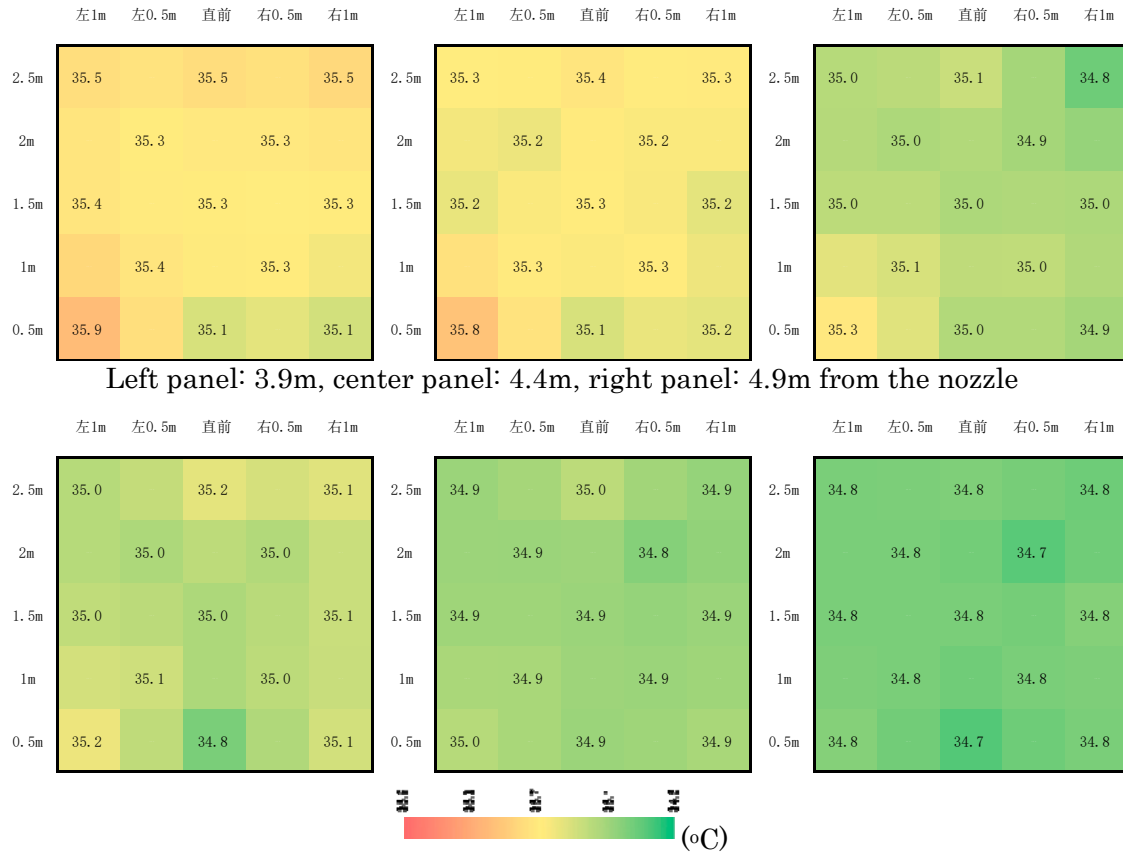

Left panel: 5.4m, center panel: 5.9m, right panel: 6.4m from nozzle  
**Figure S5.** Vertical section of measured air temperature in a park at 15:10 (▲: nozzle position).

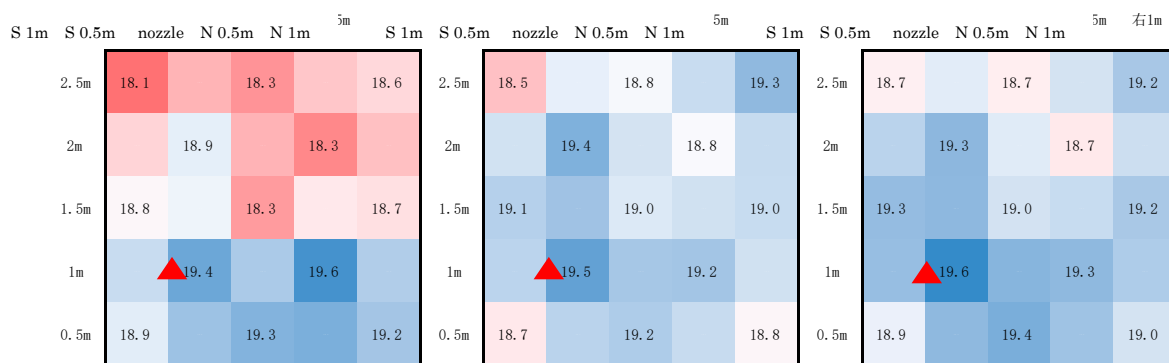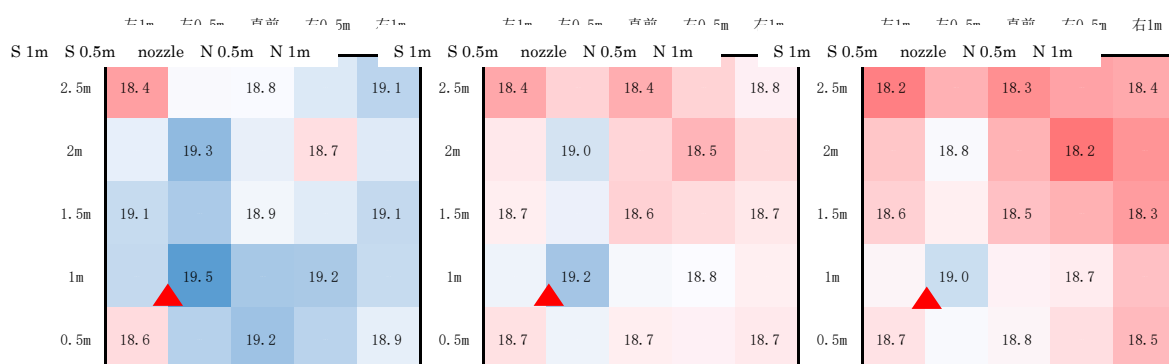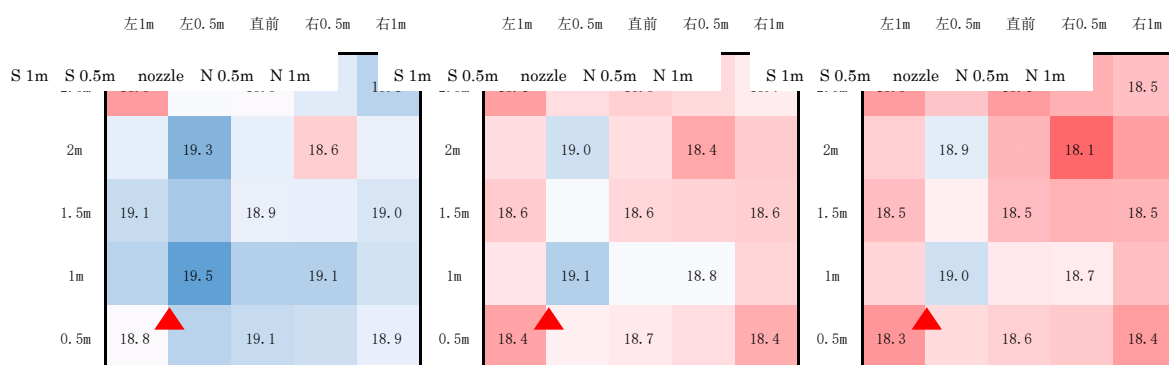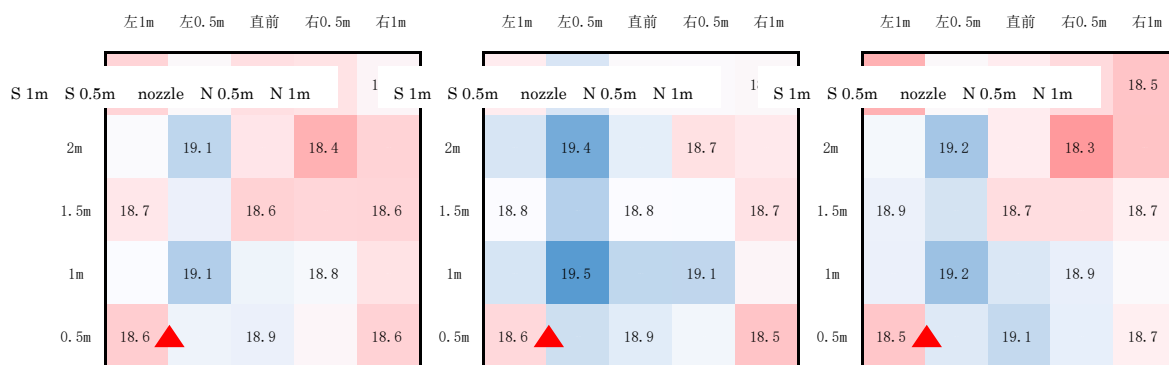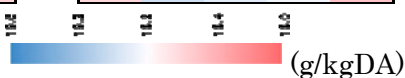

Figure S6. Vertical section of measured humidity in a park at 10:30 (▲: nozzle position).

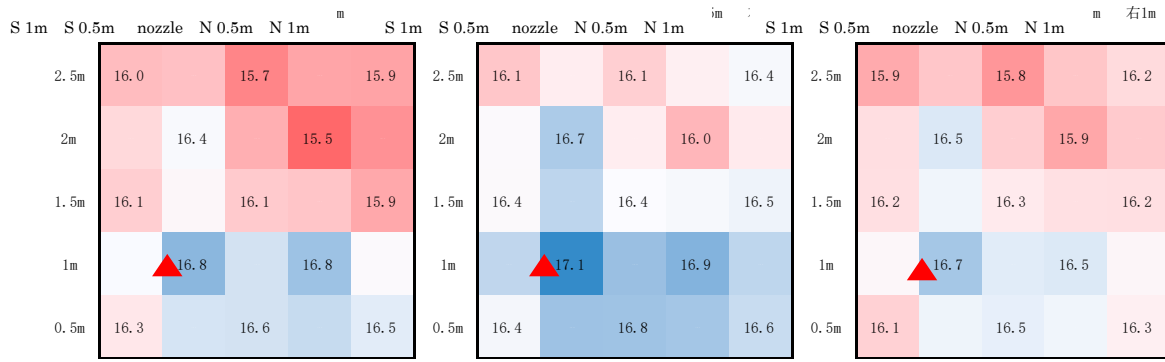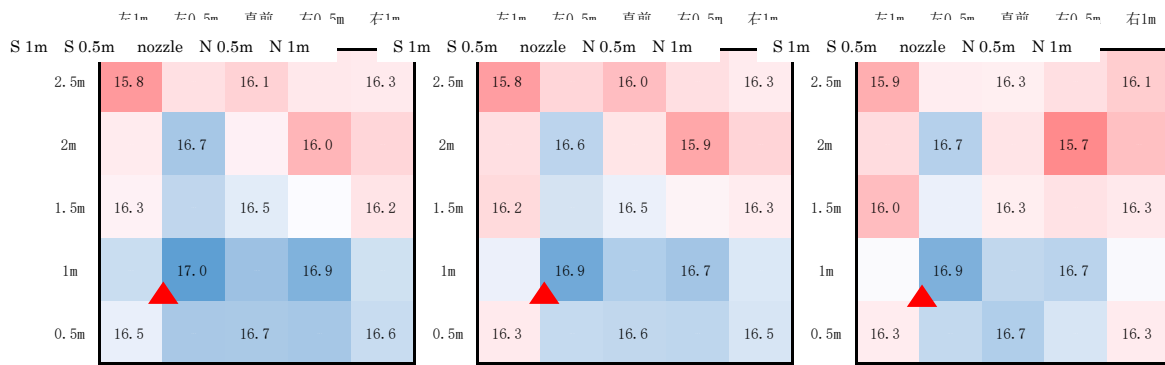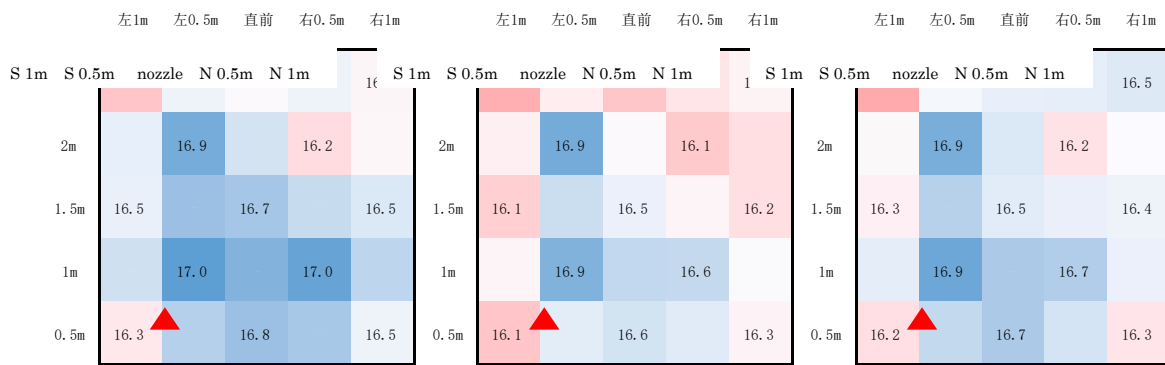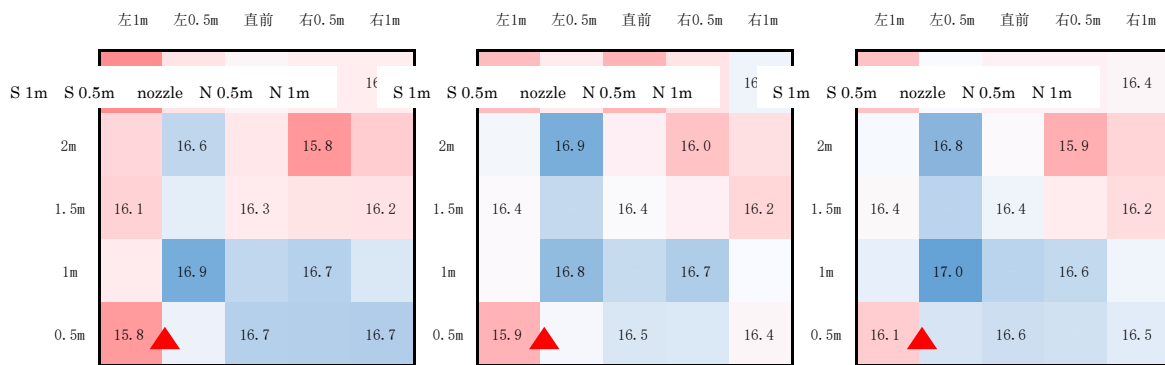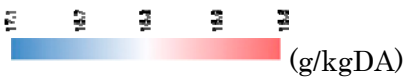

Left panel: 5.4m, center panel: 5.9m, right panel: 6.4m from nozzle  
**Figure S7.** Vertical section of measured humidity in a park at 13:00 (▲: nozzle position).



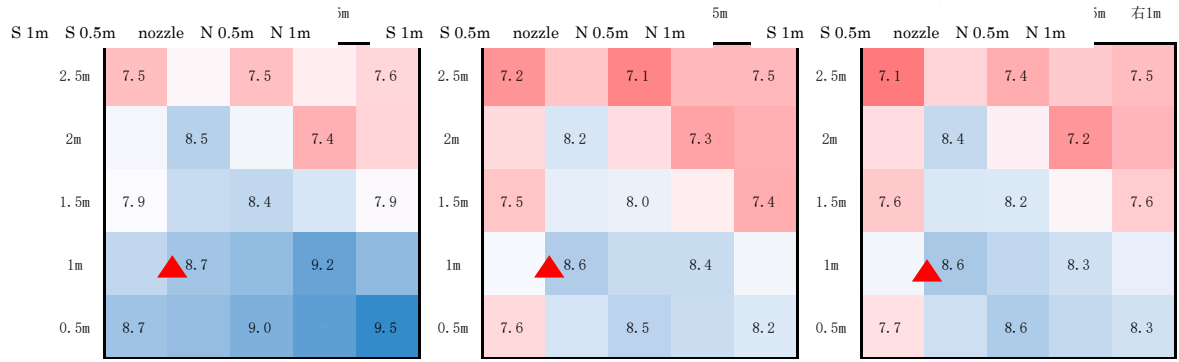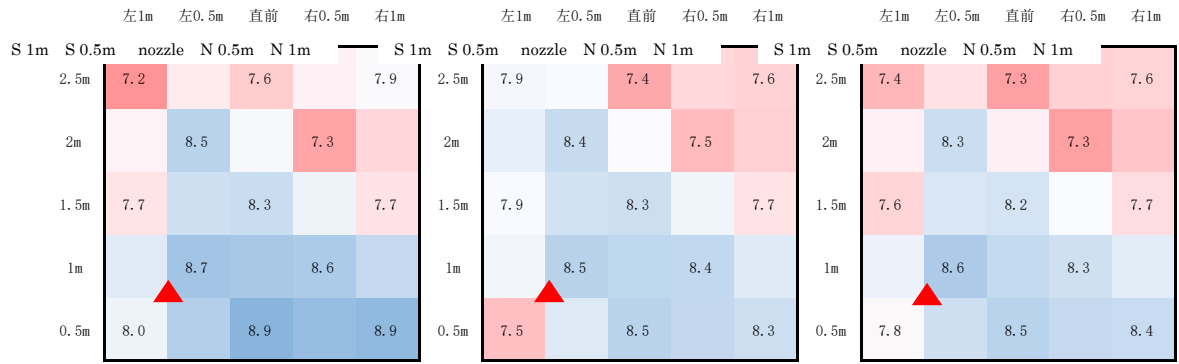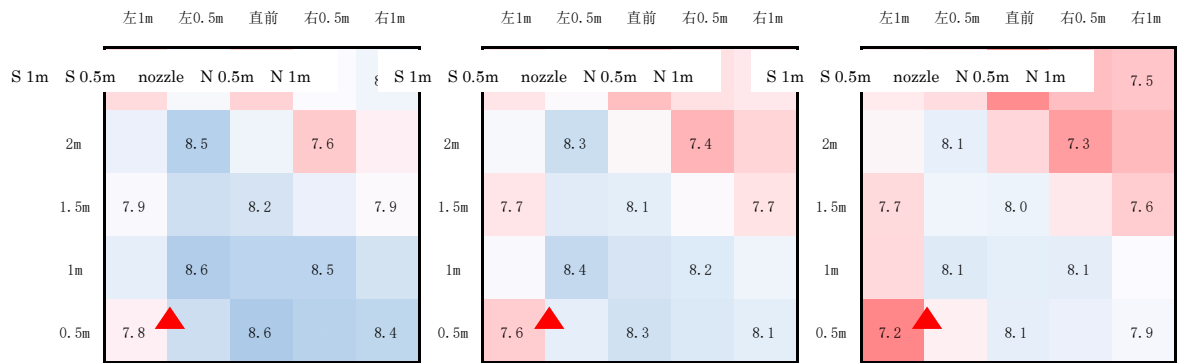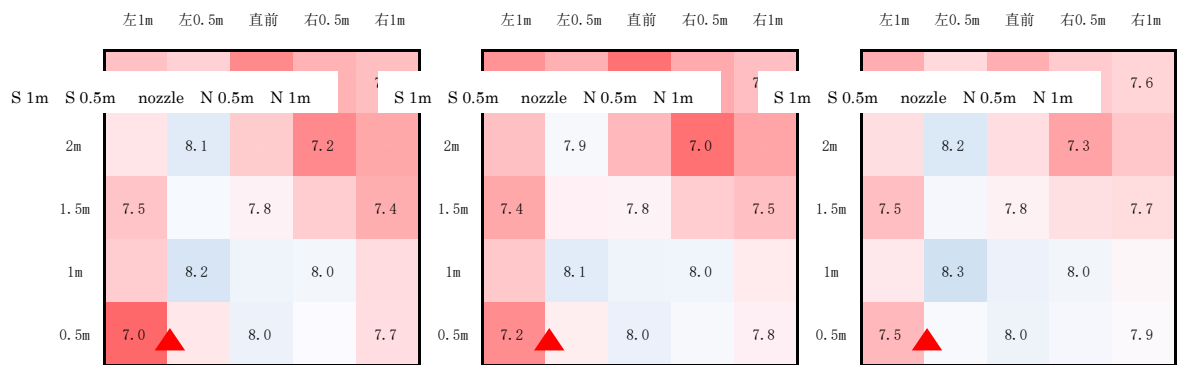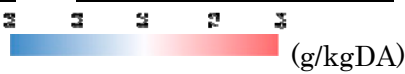

Left panel: 5.4m, center panel: 5.9m, right panel: 6.4m from nozzle

**Figure S8.** Vertical section of measured humidity in a park at 15:10 (▲: nozzle position).

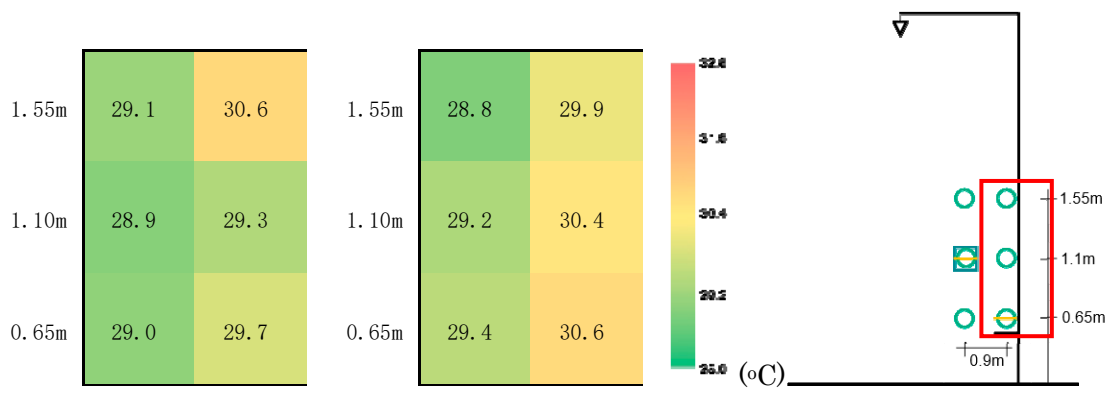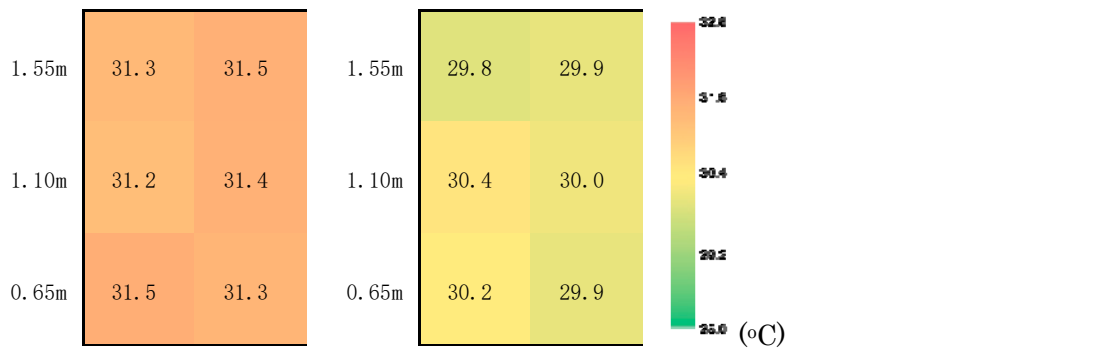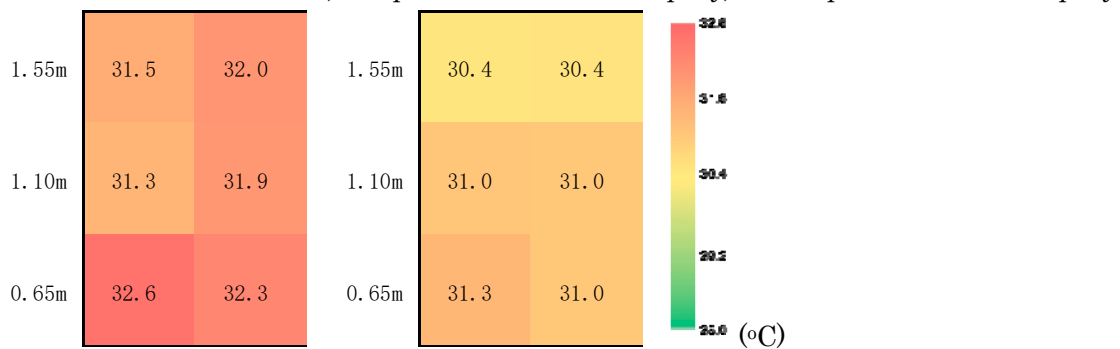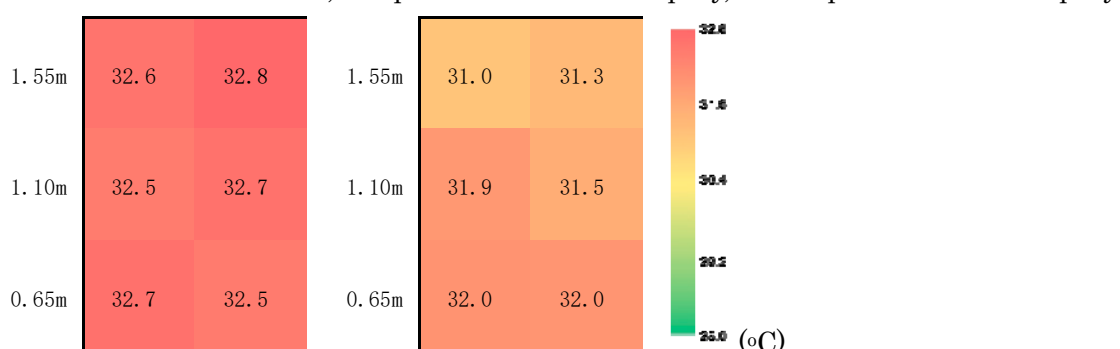

**Figure S9.** Vertical section of measured air temperature at bus stop.

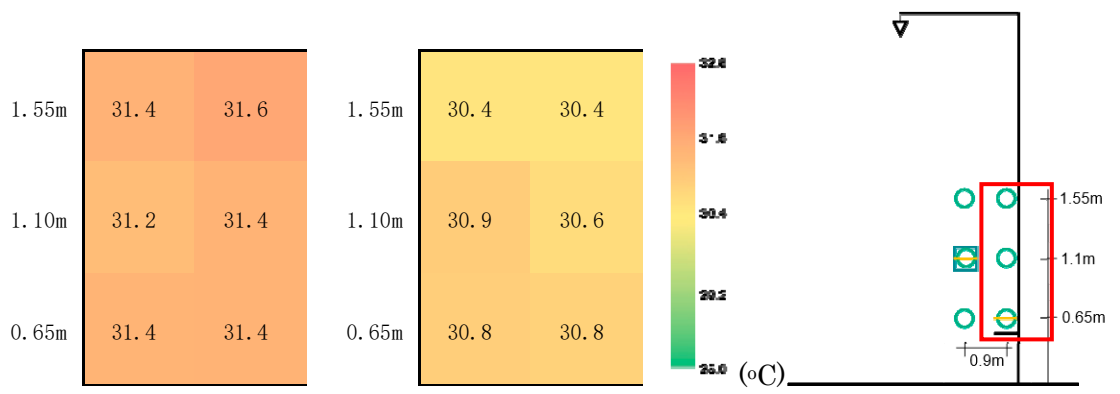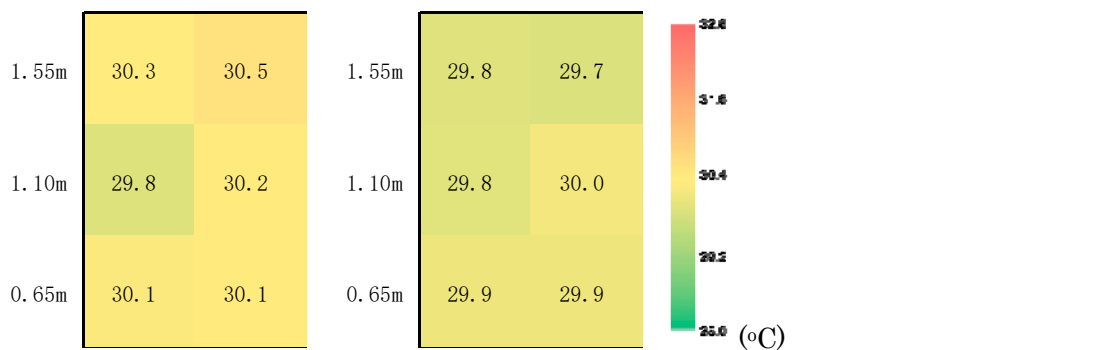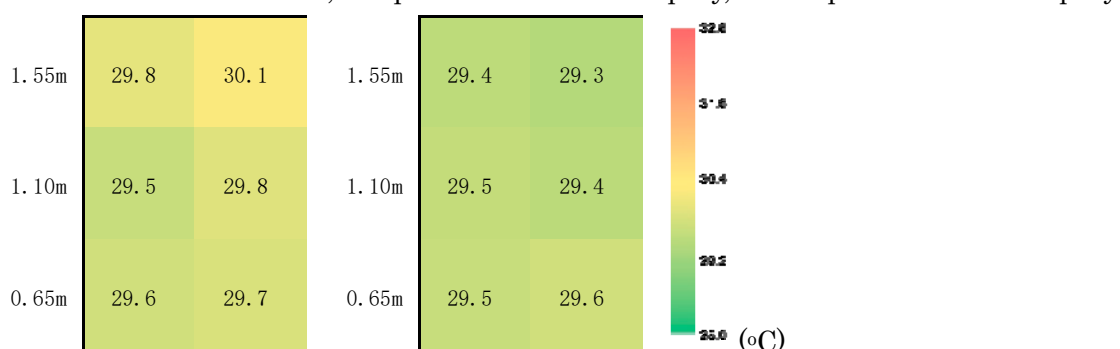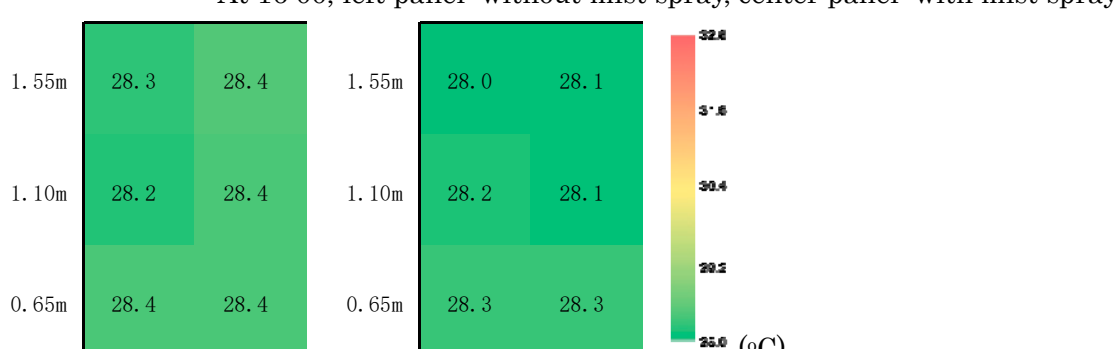

**Figure S10.** Vertical section of measured air temperature at bus stop (continued).

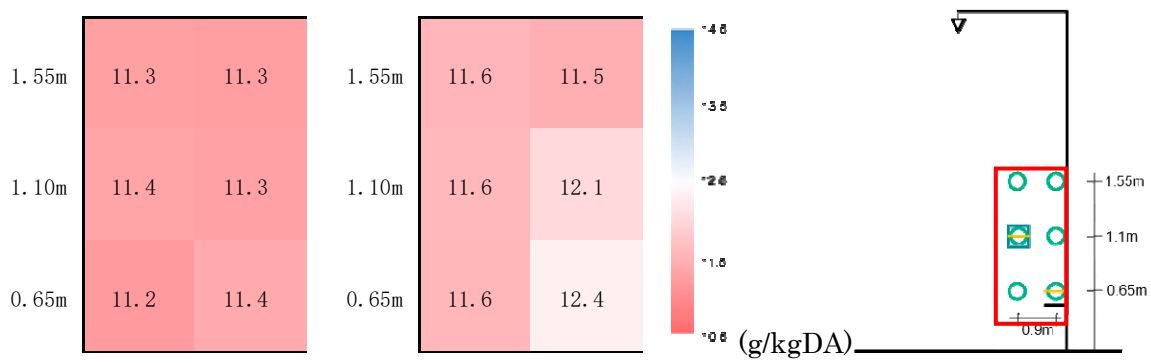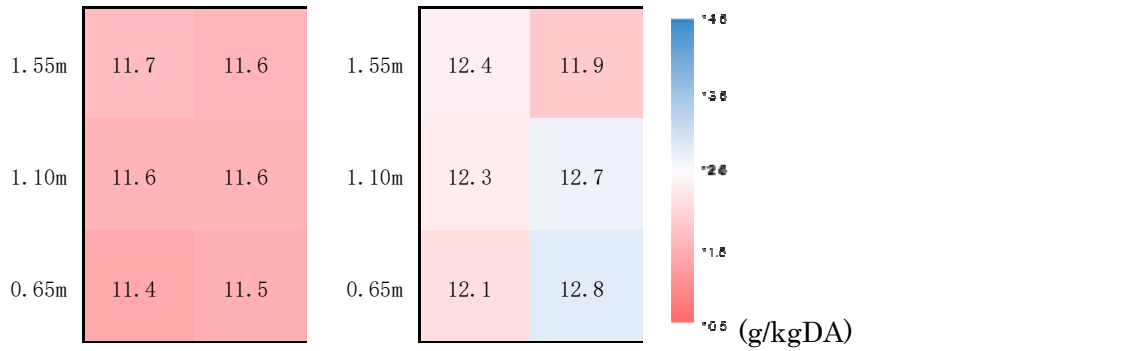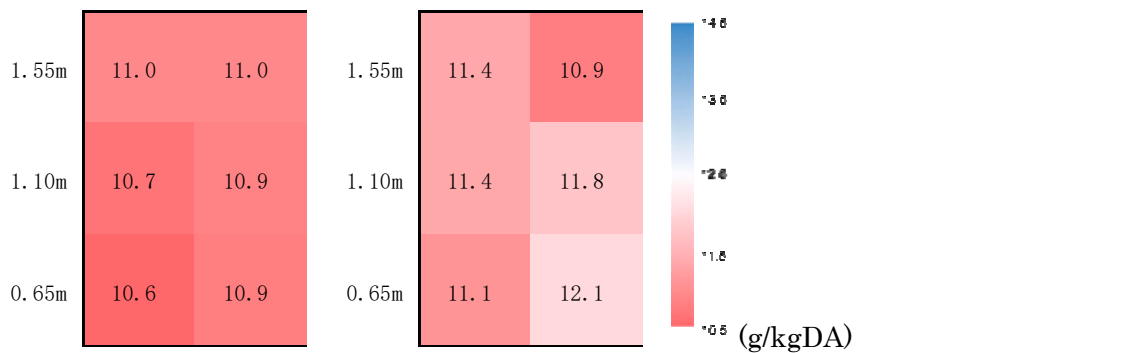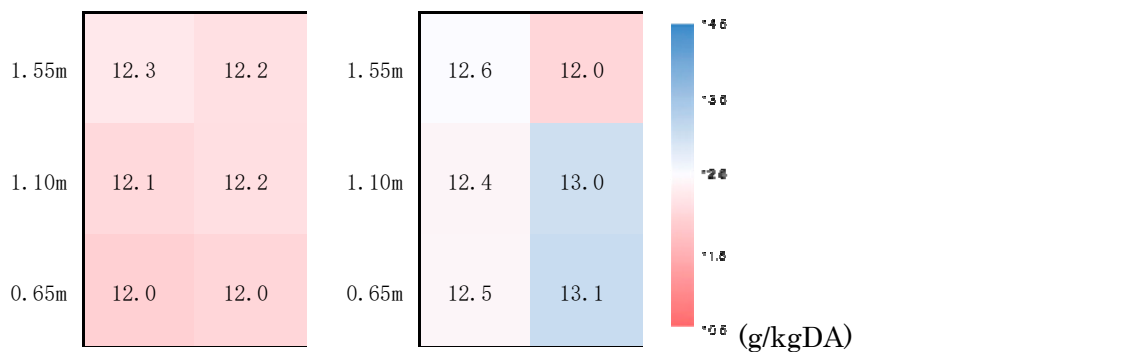

**Figure S11.** Vertical section of measured humidity at bus stop.

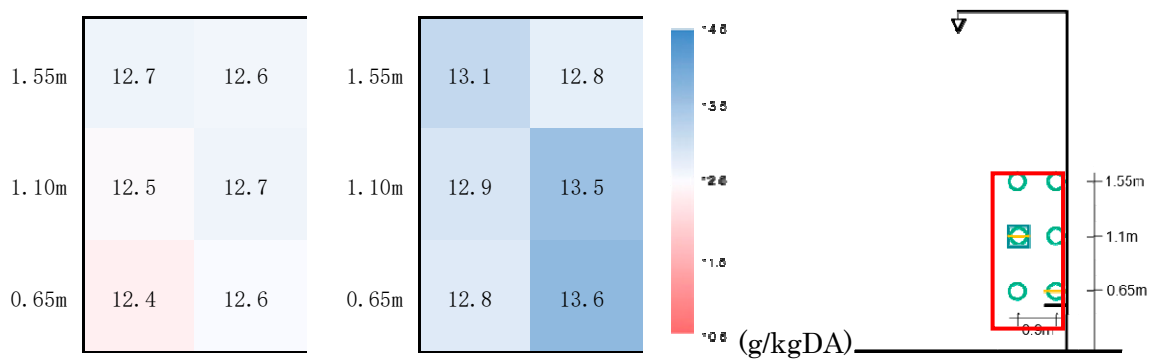

At 14:00, left panel: without mist spray, center panel: with mist spray

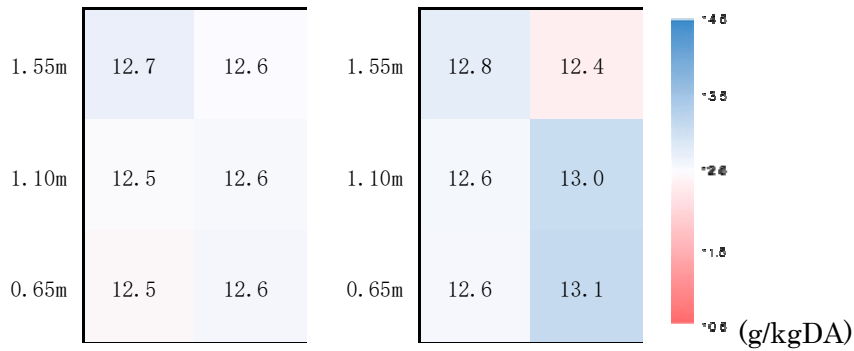

At 15:00, left panel: without mist spray, center panel: with mist spray

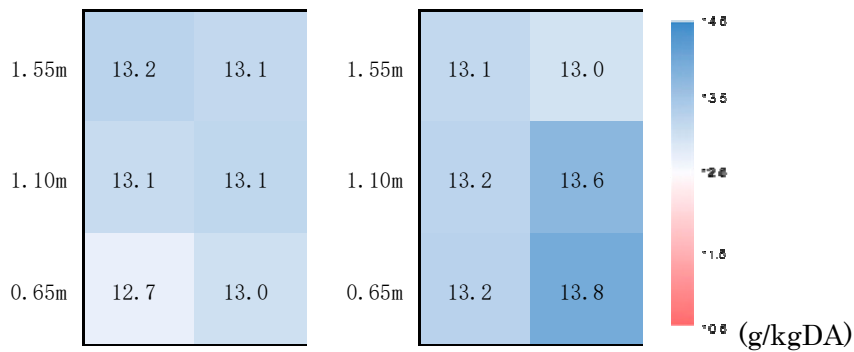

At 16:00, left panel: without mist spray, center panel: with mist spray

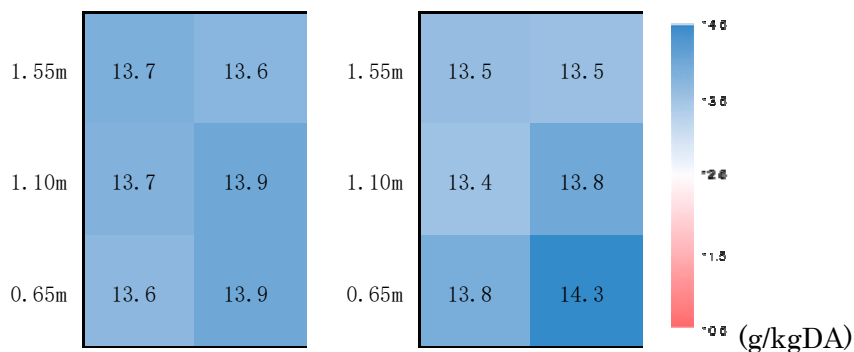

At 17:00, left panel: without mist spray, center panel: with mist spray

**Figure S12.** Vertical section of measured humidity at bus stop (continued).
